# Supplementary material for: A dual-module co-regulated stable pressure sensor for human activity monitoring
Source: Royal Society of Chemistry journal article supplement (doi:10.1039/d3dt02587j), 2023-01-01
Supplement: d3dt02587j1.pdf [file d3dt02587j1.pdf]

## Support Information

### **Dual-module co-regulated stable pressure sensor for human activity monitoring**

Xiang Li <sup>a, b</sup>, Wanzhihan Zhang <sup>a</sup>, Lanzhen Nie <sup>a</sup>, Xiaohui Zhao <sup>a\*</sup>, Xiaoting Li <sup>b\*</sup>,  
Wenming Zhang <sup>a\*</sup>

<sup>a</sup> *Province-Ministry Co-construction Collaborative Innovation Center of Hebei Photovoltaic Technology, College of Physics Science and Technology, Hebei University, Baoding 071002, China.*

<sup>b</sup> *National & Local Joint Engineering Research Center of Metrology Instrument and System, College of Quality and Technical Supervision, Hebei University, Baoding, 071002, China.*

#### **Corresponding author at:**

E-mail: xhzhao123@163.com (X. Zhao), lxt@hbu.edu.cn (X. Li), wmzhanghbu@126.com (W. Zhang)

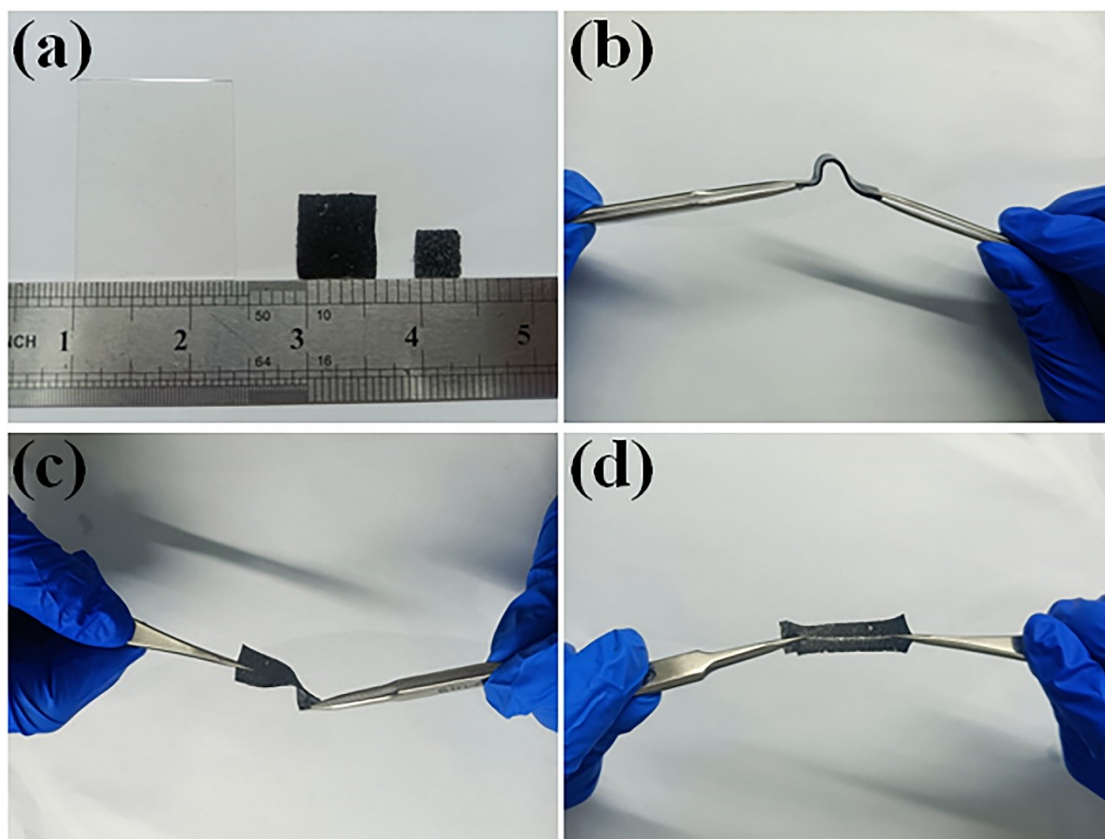

Fig. S1 (a) Comparison of photos of pure PDMS, PDMS with doped carbon nanotubes and PDMS made by double template method. (b) Photo of sensor bending (c) Photo of sensor twisting (d) Photo of sensor stretching.

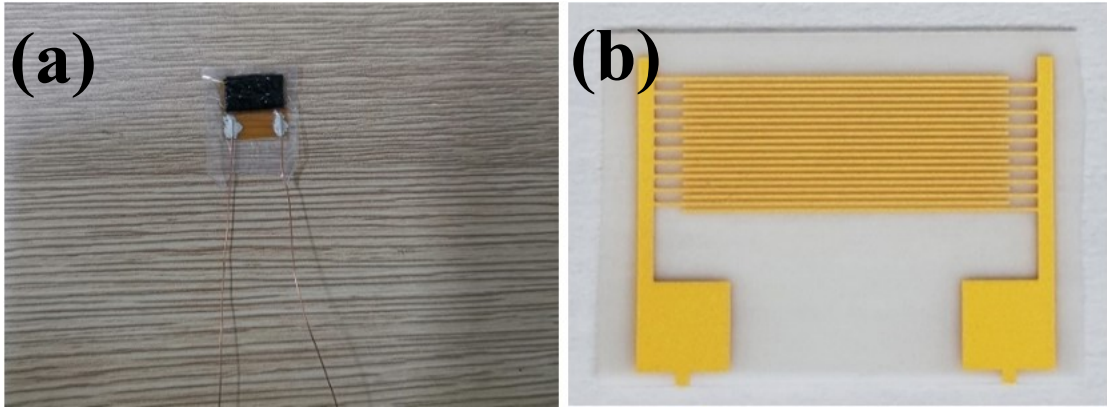

Fig. S2 (a) Picture of the sensor after assembly (b) Picture of interdigital electrode.

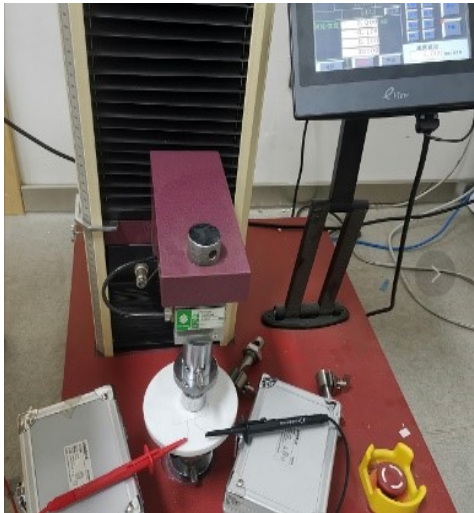

Fig. S3 Sensor performance test photo.

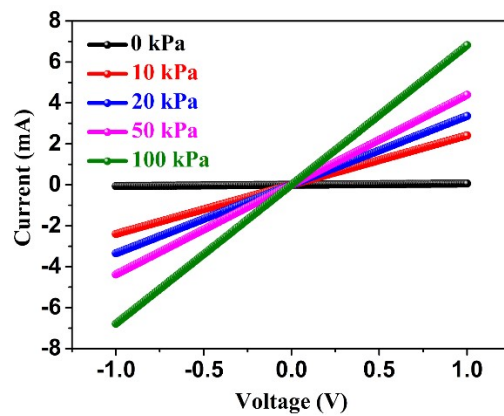

Fig. S4 The sensor device's current and voltage (I-V) property with pressure and non-pressure. The linear characteristic of the I-V curve with voltage between  $-1$  and  $1$  V show that the sensor follows the Ohm's law and that the conductivity (or sensitivity) of the pressure sensor does not rely on the operating voltage.

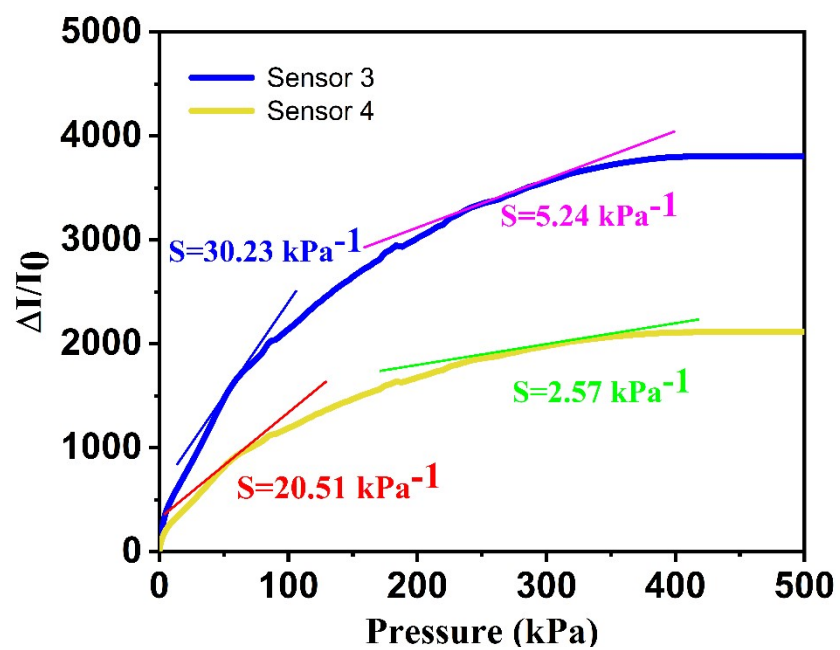

Fig. S5 Sensitivity comparison of sensors made with and without salt templates.

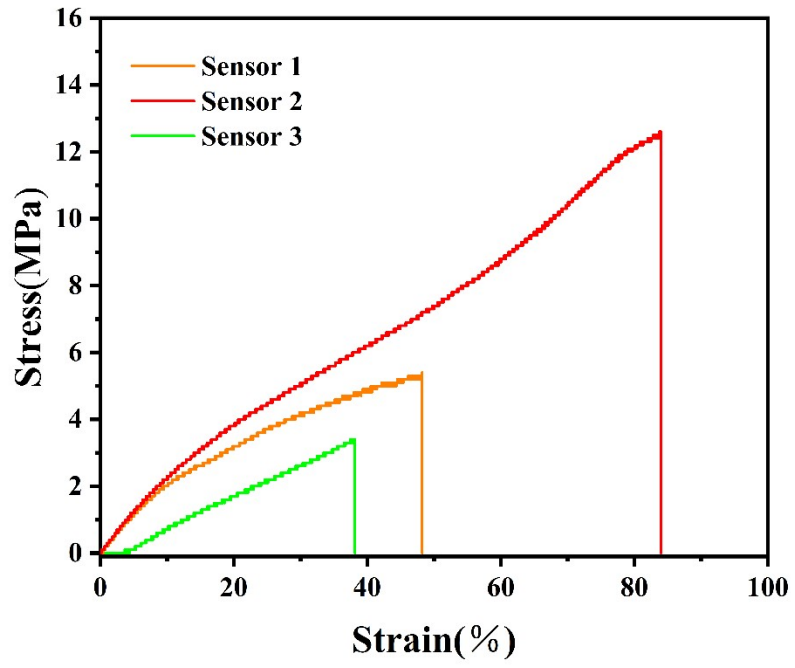

Fig. S6 Comparison of stress-strain curves for sensors fabricated using the template method and the non-template method.

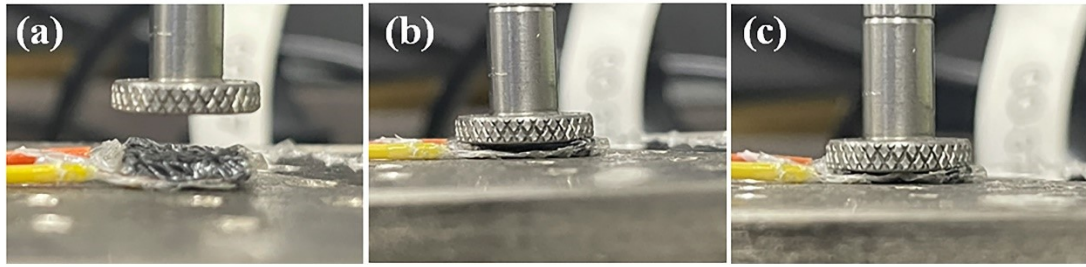

Fig. S7 The morphology comparison of the sensor under different pressures. (a) The initial state of the flexible sensor. (b) Deformation picture of the pressure sensor when pressure is applied. (c) Deformation picture of the pressure sensor when large pressure is applied.



**Table S1.** Summary of performance of flexible pressure sensor reported in the literature.

| Materials               | Structure /Microstructure            | Sensitivity(kPa <sup>-1</sup> ) | Detection range (kPa) | Ref       |
|-------------------------|--------------------------------------|---------------------------------|-----------------------|-----------|
| AgNWs/NCP               | Sandwich structure                   | 1.5                             | 30.2                  | [1]       |
| ZIF-67@CD               | Sandwich structure                   | 3.1                             | 470                   | [2]       |
| CB/MXene/SR             | Biomimetic structure                 | 2.18                            | 1700                  | [3]       |
| AgNWs/PDMS microspheres | Wrinkled surface                     | 2.588                           | 20                    | [4]       |
| /sandpaper              | Random pore structure                | 11.02                           | 30                    | [5]       |
| rGO /MXene              | Hierarchical micro-spine's structure | -                               | 70                    | [6]       |
| AgNWs@PDMS              | Micro-convex structure               | 0.78                            | 20                    | [7]       |
| MXene                   | Porous structure                     | 1.52                            | 100                   | [8]       |
| rGO / PDMS              | Micro-pyramid structure              | 1.71                            | 0.225                 | [9]       |
| PANI/PDMS               | Hollow microstructure                | 0.641                           | 60                    | [10]      |
| CFs/ CNTs/ PDMS         | Interwoven structure                 | 2.02                            | 50.2                  | [11]      |
| CNTs/ PDMS /CB          | Porous microstructure                | 58.33                           | 400                   | This work |

## Supplementary References

- [1] L. Gao, C. Zhu, L. Li, C. Zhang, J. Liu, H.-D. Yu, W. Huang, All paper-based flexible and wearable piezoresistive pressure sensor, *ACS Applied Materials & Interfaces*, 11 (2019) 25034-25042.
- [2] N. Hou, Y. Zhao, R. Jiang, L. Nie, J. Yang, Y. Wang, L. Li, X. Li, W. Zhang, Flexible piezoresistive sensor based on surface modified dishcloth fibers for wearable electronics device, *Colloids and Surfaces A: Physicochemical and Engineering Aspects*, 650 (2022) 129638.
- [3] X. Guo, W. Hong, B. Hu, T. Zhang, C. Jin, X. Yao, H. Li, Z. Yan, Z. Jiao, M. Wang, Human touch sensation-inspired, ultrawide-sensing-range, and high-robustness flexible piezoresistive sensor based on CB/MXene/SR/fiber nanocomposites for wearable electronics, *Composite Structures*, (2023) 117329.
- [4] D. Du, X. Ma, W. An, S. Yu, Flexible piezoresistive pressure sensor based on wrinkled layers with fast response for wearable applications, *Measurement*, 201 (2022) 111645.
- [5] Y. Zhang, X. Zhang, X. Zhang, L. Li, A low-cost flexible piezoresistive sensor with high sensitivity and broad detection range based on porous random microstructures for wearable electronics, *Smart Materials and Structures*, 32 (2022) 025005.
- [6] J. Xu, L. Zhang, X. Lai, X. Zeng, H. Li, Wearable RGO/MXene Piezoresistive Pressure Sensors with Hierarchical Microspines for Detecting Human Motion, *ACS Applied Materials & Interfaces*, 14 (2022) 27262-27273.
- [7] D. Du, X. Ma, L. Zhao, W. An, S. Yu, Piezoresistive flexible pressure sensor using vuggy clays as templates, *Journal of Materials Science: Materials in Electronics*, 33 (2022) 11487-11497.
- [8] Q. Wei, G. Chen, H. Pan, Z. Ye, C. Au, C. Chen, X. Zhao, Y. Zhou, X. Xiao, H. Tai, MXene-sponge based high-performance piezoresistive sensor for wearable biomonitoring and real-time tactile sensing, *Small Methods*, 6 (2022) 2101051.
- [9] J. Zhang, L. Zhou, H. Zhang, Z. Zhao, S. Dong, S. Wei, J. Zhao, Z. Wang, B. Guo, P. Hu, Highly sensitive flexible three-axis tactile sensors based on the interface contact resistance of microstructured graphene, *Nanoscale*, 10 (2018) 7387-7395.
- [10] S. Zheng, Y. Jiang, X. Wu, Z. Xu, Z. Liu, W. Yang, M. Yang, Highly sensitive pressure sensor with broad linearity via constructing a hollow structure in polyaniline/polydimethylsiloxane composite, *Composites Science and Technology*, 201 (2021) 108546.
- [11] J. Zhu, X. Xue, J. Li, J. Wang, H. Wang, Y. Xing, P. Zhu, Flexible pressure sensor with a wide pressure measurement range and an agile response based on multiscale carbon fibers/carbon nanotubes composite, *Microelectronic Engineering*, 257 (2022) 111750.
